# Supplementary material for: Retreatment with immune checkpoint inhibitors in solid tumors: a systematic review
Source: PubMed Central journal article supplement — Ther Adv Med Oncol. 2020 Nov 27;12:1758835920975353. doi: 10.1177/1758835920975353 (PMC7705192; doi:10.1177/1758835920975353), 2020-11-27
Supplement: sj-pdf-1-tam-10.1177_1758835920975353.pdf [file sj-pdf-1-tam-10.1177_1758835920975353.pdf]

Supplementary 1 Search strategy

|         |                                                                                                                                                                                                                                                                                                                                                                                                                                                                       |
|---------|-----------------------------------------------------------------------------------------------------------------------------------------------------------------------------------------------------------------------------------------------------------------------------------------------------------------------------------------------------------------------------------------------------------------------------------------------------------------------|
| MEDLINE |                                                                                                                                                                                                                                                                                                                                                                                                                                                                       |
| #1      | "Neoplasms"[Mesh]                                                                                                                                                                                                                                                                                                                                                                                                                                                     |
| #2      | carcinoma*[tiab] OR cancer*[tiab] OR adenocarcinoma*[tiab] OR malignan*[tiab] OR tumor*[tiab] OR tumour*[tiab] OR neoplasm*[tiab]                                                                                                                                                                                                                                                                                                                                     |
| #3      | "immune checkpoint"[tiab] OR CTLA-4[tiab] OR PD-1[tiab] OR PD-L1[tiab] OR ipilimumab[tiab] OR atezolizumab[tiab] OR durvalumab[tiab] OR pembrolizumab[tiab] OR nivolumab[tiab] OR avelumab[tiab] OR tremelimumab[tiab] OR cemiplimab[tiab]                                                                                                                                                                                                                            |
| #4      | rechallenge[tiab] OR reintroduction[tiab] OR retreatment[tiab] OR readministration[tiab] OR intermittent[tiab] OR resum*[tiab] OR sequential[tiab] OR "ipilimumab-refractory"[tiab] OR "atezolizumab-refractory"[tiab] OR "durvalumab-refractory"[tiab] OR "pembrolizumab-refractory"[tiab] OR "nivolumab-refractory"[tiab] OR "avelumab-refractory"[tiab] OR "tremelimumab-refractory"[tiab] OR "cemiplimab-refractory"[tiab] OR "second course"[tiab]               |
| #5      | #1 OR #2                                                                                                                                                                                                                                                                                                                                                                                                                                                              |
| #6      | #3 AND #4 AND #5                                                                                                                                                                                                                                                                                                                                                                                                                                                      |
| Embase  |                                                                                                                                                                                                                                                                                                                                                                                                                                                                       |
| #1      | 'malignant neoplasm'/exp                                                                                                                                                                                                                                                                                                                                                                                                                                              |
| #2      | 'carcinoma*':ab,ti OR 'cancer*':ab,ti OR 'adenocarcinoma*':ab,ti OR 'malignan*':ab,ti OR 'tumor*':ab,ti OR 'tumour*':ab,ti OR 'neoplasm*':ab,ti                                                                                                                                                                                                                                                                                                                       |
| #3      | #1 OR #2                                                                                                                                                                                                                                                                                                                                                                                                                                                              |
| #4      | 'immune checkpoint':ab,ti OR 'ctla-4':ab,ti OR 'pd-1':ab,ti OR 'pd-l1':ab,ti OR 'ipilimumab':ab,ti OR 'atezolizumab':ab,ti OR 'durvalumab':ab,ti OR 'pembrolizumab':ab,ti OR 'nivolumab':ab,ti OR 'avelumab':ab,ti OR 'tremelimumab':ab,ti OR 'cemiplimab':ab,ti                                                                                                                                                                                                      |
| #5      | 'rechallenge':ab,ti OR 'reintroduction':ab,ti OR 'retreatment':ab,ti OR 'readministration':ab,ti OR 'intermittent':ab,ti OR 'resum*':ab,ti OR 'sequential':ab,ti OR 'ipilimumab-refractory':ab,ti OR 'atezolizumab-refractory':ab,ti OR 'durvalumab-refractory':ab,ti OR 'pembrolizumab-refractory':ab,ti OR 'nivolumab-refractory':ab,ti OR 'avelumab-refractory':ab,ti OR 'tremelimumab-refractory':ab,ti OR 'cemiplimab-refractory':ab,ti OR 'second course':ab,ti |
| #6      | #3 AND #4 AND #5                                                                                                                                                                                                                                                                                                                                                                                                                                                      |
| #7      | #6 NOT ('animal cell'/de OR 'animal experiment'/de OR 'animal model'/de OR 'animal tissue'/de OR 'cancer model'/de OR 'case report'/de OR 'case study'/de OR 'drug surveillance program'/de OR 'feasibility study'/de OR 'human cell'/de OR 'human tissue'/de OR 'model'/de OR 'mouse model'/de OR 'nonhuman'/de OR 'practice guideline'/de OR 'systematic review'/de)                                                                                                |

|         |                                                                                                                                                                                                                                                                                                                                                                                                                                                                                                                       |
|---------|-----------------------------------------------------------------------------------------------------------------------------------------------------------------------------------------------------------------------------------------------------------------------------------------------------------------------------------------------------------------------------------------------------------------------------------------------------------------------------------------------------------------------|
| #8      | #7 AND (2005:py OR 2006:py OR 2007:py OR 2008:py OR 2009:py OR 2010:py OR 2011:py OR 2012:py OR 2013:py OR 2014:py OR 2015:py OR 2016:py OR 2017:py OR 2018:py OR 2019:py OR 2020:py)                                                                                                                                                                                                                                                                                                                                 |
| CENTRAL |                                                                                                                                                                                                                                                                                                                                                                                                                                                                                                                       |
| #1      | MeSH: Neoplasms                                                                                                                                                                                                                                                                                                                                                                                                                                                                                                       |
| #2      | (carcinoma):ti,ab,kw OR (cancer*):ti,ab,kw OR (adenocarcinoma*):ti,ab,kw OR (malignan*):ti,ab,kw OR (tumor*):ti,ab,kw OR (tumour*):ti,ab,kw OR (neoplasm*):ti,ab,kw                                                                                                                                                                                                                                                                                                                                                   |
| #3      | #1 OR #2                                                                                                                                                                                                                                                                                                                                                                                                                                                                                                              |
| #4      | (immune checkpoint):ti,ab,kw OR (CTLA-4):ti,ab,kw OR (PD-1):ti,ab,kw OR (PD-L1):ti,ab,kw OR (ipilimumab):ti,ab,kw OR (atezolizumab):ti,ab,kw OR (durvalumab):ti,ab,kw OR (pembrolizumab):ti,ab,kw OR (nivolumab):ti,ab,kw OR (avelumab):ti,ab,kw OR (tremelimumab):ti,ab,kw OR (cemiplimab):ti,ab,kw                                                                                                                                                                                                                  |
| #5      | (rechallenge):ti,ab,kw OR (reintroduction):ti,ab,kw OR (retreatment):ti,ab,kw OR (readministration):ti,ab,kw OR (intermittent):ti,ab,kw OR (resum*):ti,ab,kw OR (sequential):ti,ab,kw OR (ipilimumab-refractory):ti,ab,kw OR (atezolizumab-refractory):ti,ab,kw OR (durvalumab-refractory):ti,ab,kw OR (pembrolizumab-refractory):ti,ab,kw OR (nivolumab-refractory):ti,ab,kw OR (avelumab-refractory):ti,ab,kw OR (tremelimumab-refractory):ti,ab,kw OR (cemiplimab-refractory):ti,ab,kw OR (second course):ti,ab,kw |
| #6      | #3 AND #4 AND #5                                                                                                                                                                                                                                                                                                                                                                                                                                                                                                      |

Supplementary 2 Risk of bias assessment of included studies

|                                   | Bias due to confounding | Bias in selection of participants | Bias in classification of interventions | Bias due to deviations from intended interventions | Bias due to missing data | Bias in measurement of outcomes | Bias in selection of the reported result | Overall bias |
|-----------------------------------|-------------------------|-----------------------------------|-----------------------------------------|----------------------------------------------------|--------------------------|---------------------------------|------------------------------------------|--------------|
| Chiarion-Silenti et al. (2014)    | high                    | low                               | low                                     | moderate                                           | low                      | low                             | low                                      | high         |
| Robert et al. (2013)              | moderate                | low                               | low                                     | moderate                                           | low                      | low                             | low                                      | moderate     |
| Lebbé et al (2014)                | high                    | low                               | low                                     | moderate                                           | moderate                 | low                             | low                                      | high         |
| Robert et al. (KEYNOTE-001, 2014) | moderate                | low                               | low                                     | moderate                                           | low                      | low                             | low                                      | moderate     |
| Hamid et al. (2017)               | moderate                | low                               | low                                     | moderate                                           | low                      | low                             | low                                      | moderate     |
| Larkin et al. (2017)              | moderate                | low                               | low                                     | moderate                                           | low                      | low                             | low                                      | moderate     |
| Weber et al. (2016)               | moderate                | low                               | low                                     | moderate                                           | low                      | low                             | low                                      | moderate     |
| Long et al. (KEYNOTE-006, 2020)   | moderate                | low                               | low                                     | moderate                                           | low                      | low                             | low                                      | moderate     |
| Herbst et al. (2020)              | moderate                | low                               | low                                     | moderate                                           | low                      | low                             | low                                      | moderate     |
| Diaz et al. (2020)                | moderate                | low                               | low                                     | moderate                                           | low                      | low                             | low                                      | moderate     |

|                             |          |     |     |          |          |     |     |          |
|-----------------------------|----------|-----|-----|----------|----------|-----|-----|----------|
| Sheth et al. (2019)         | moderate | low | low | moderate | moderate | low | low | moderate |
| Garassino et al. (2018)     | moderate | low | low | moderate | low      | low | low | moderate |
| Lee et al. (2019)           | high     | low | low | moderate | low      | low | low | high     |
| Sandhu et al. (2019)        | high     | low | low | moderate | moderate | low | low | high     |
| Robert et al. (2019)        | high     | low | low | moderate | moderate | low | low | high     |
| Marquez-Rodas et al. (2019) | high     | low | low | moderate | moderate | low | low | high     |
| Niglio et al. (2020)        | moderate | low | low | moderate | moderate | low | low | moderate |
